# Supplementary material
Source: PubMed Central journal article supplement (PMC6818491)
Supplement: Supp_Fig1.pdf [file Supp_Fig1.pdf]

## Supplementary Data

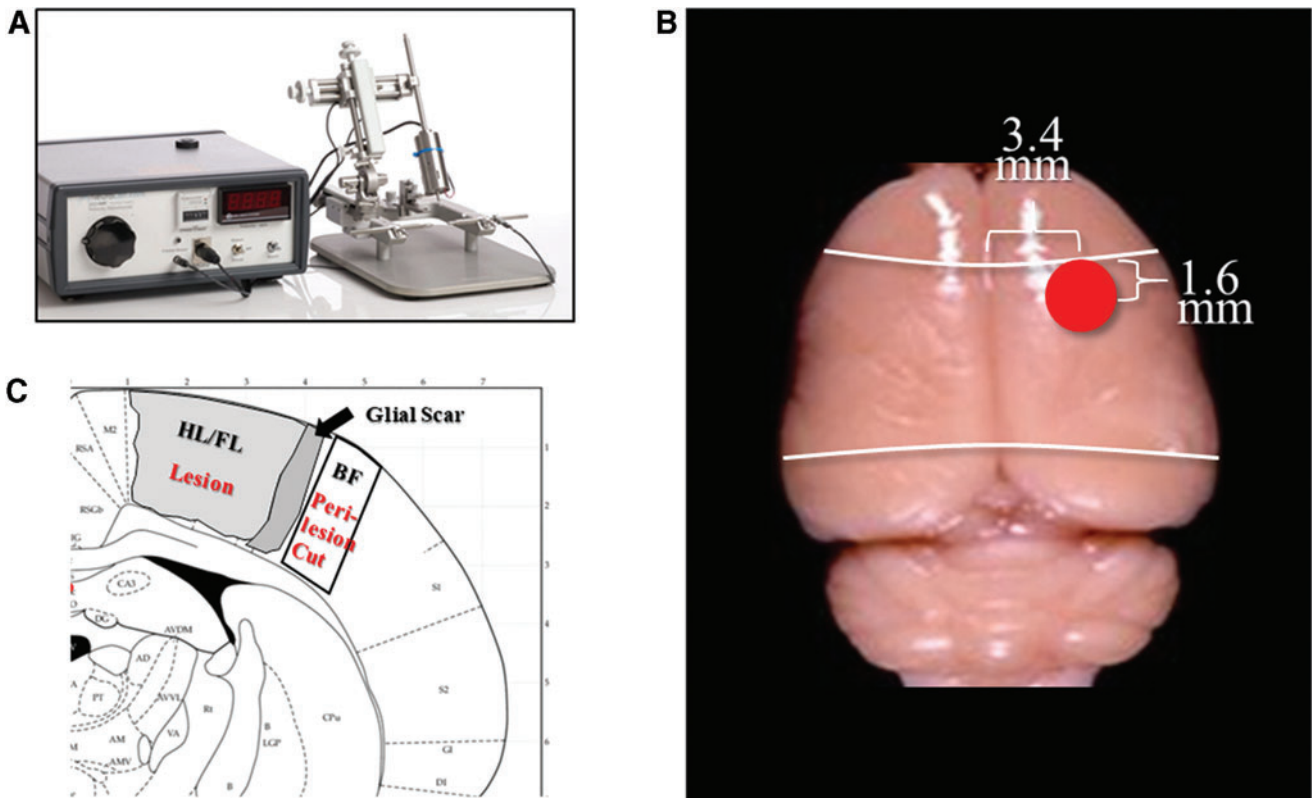

**SUPPLEMENTARY FIG. S1.** Information concerning the controlled cortical impact model and tissue collection employed in this study. (A) The Impact One (Leica) electromagnetic stereotaxic impactor was used for controlled cortical impact modeling of traumatic brain injury, configured with a 3 mm diameter stainless steel tip, set perpendicular to the brain's surface, centered (B) 3.4 mm lateral and 1.6 mm back from bregma, over somatosensory regions of front limb (FL), hindlimb (HL), and barrel field (BF) neocortex. (C) Tissue was collected from perilesional cortex just outside of glial scar.
